# Supplementary material for: Imprints of evaporation and vegetation type in diurnal temperature variations
Source: Copernicus journal article supplement (doi:10.5194/hess-2020-95), 2020-03-16

Figure R1: The density distribution of the evaporative fraction for 51 FLUXNET sites for short vegetation, savanna and forests.

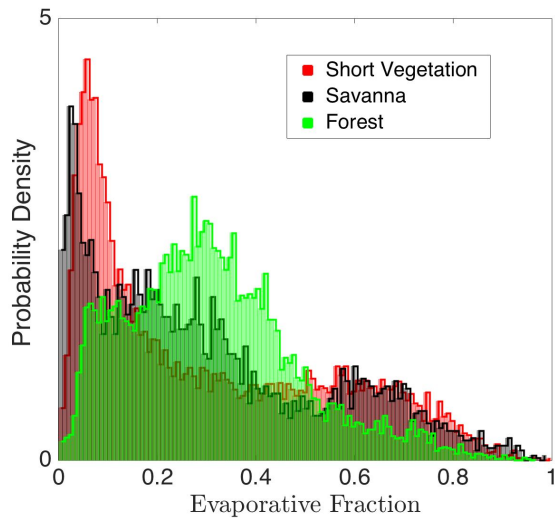

Figure R2: Warming rate response to evaporative fraction (a) and latent heat flux (b) for all the sites in short vegetation.

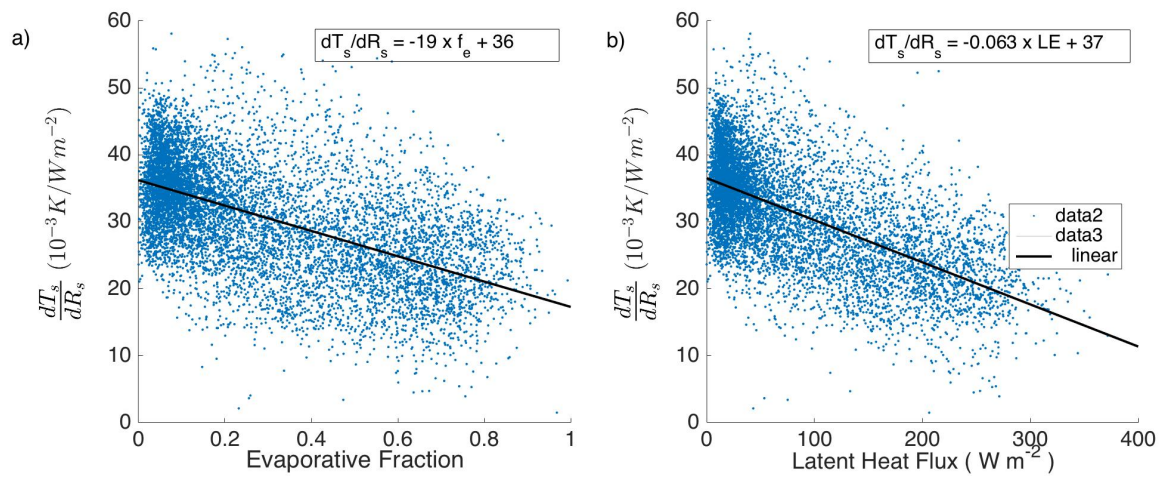

Figure R3: Demonstrating filter 1 that is used to select summer days for the analysis for US-ARM site.

The days with daily mean solar radiation greater than the median of the year are considered as summer days.

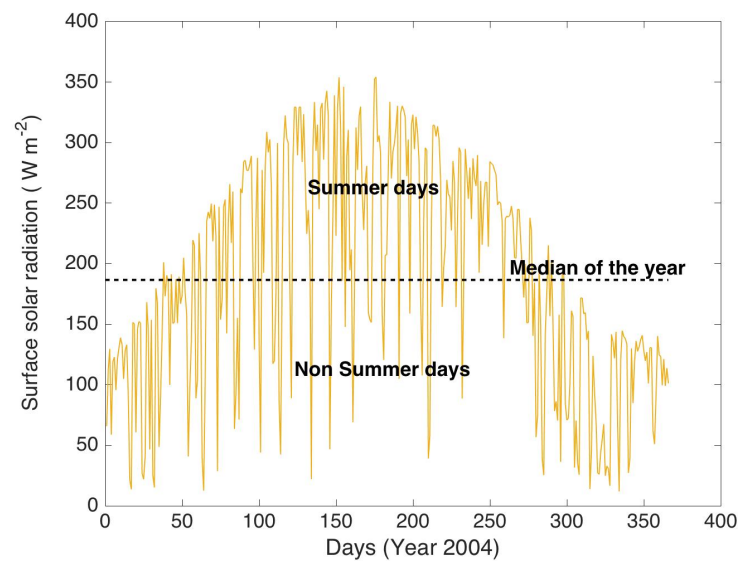

Figure R4: The legend of Figure 4 in the manuscript is corrected

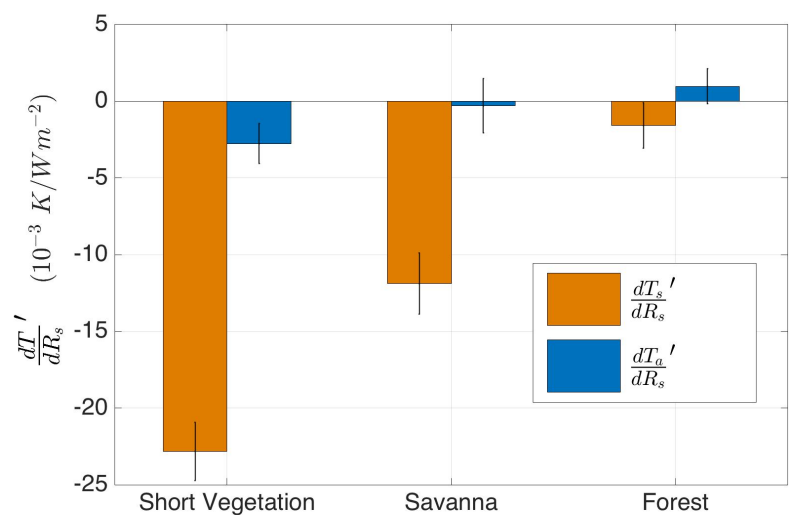

Supplement: Supplementary file [file hess-2020-95-AC1-supplement.pdf]
