# Supplementary material for: Imprints of evaporation and vegetation type in diurnal temperature variations
Source: Copernicus journal article supplement (doi:10.5194/hess-2020-95), 2020-03-16
Supplement: Supplementary file [file hess-2020-95-AC2-supplement.pdf]

## Supplement for the response to #2 reviewer

- Modified figures in the manuscript (new)

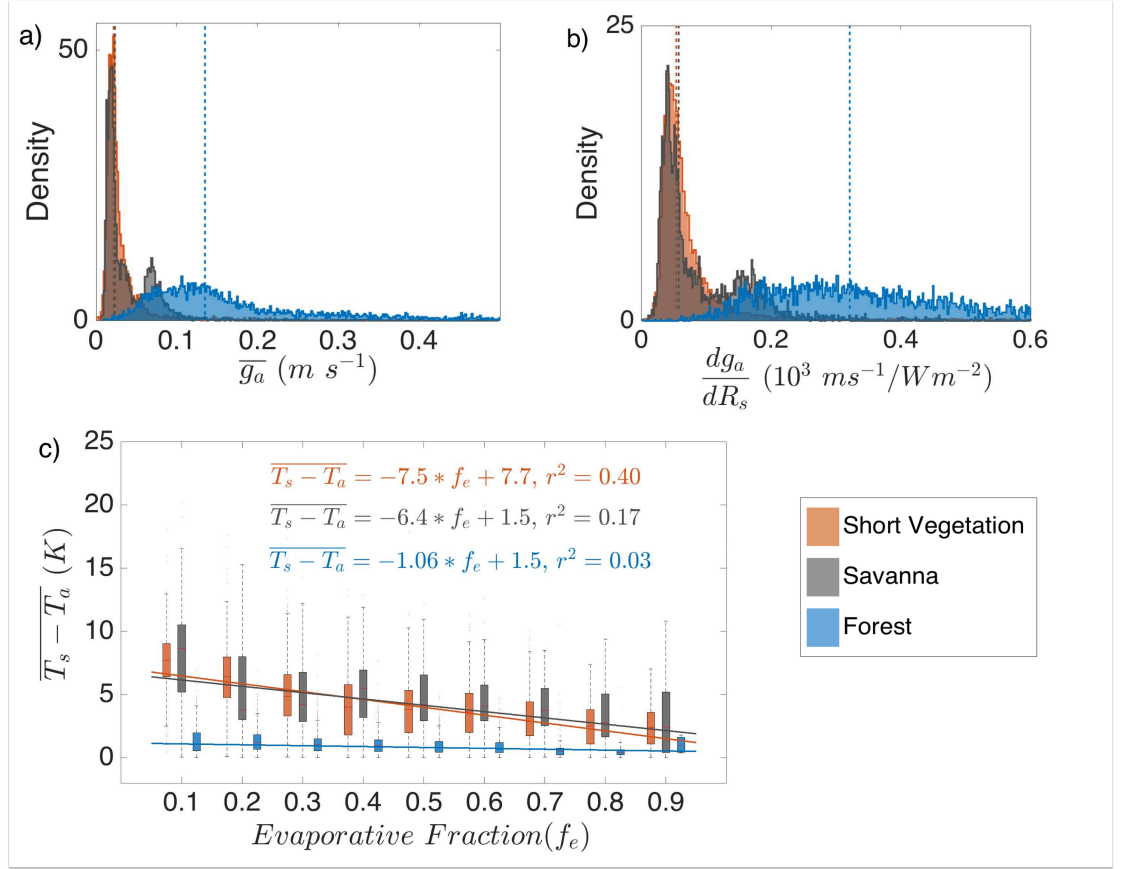

**New Figure 5** a) Observed density distribution of daily mean aerodynamic conductance ( $\overline{g_a}$ ) during the time before noon. b) Observed density distribution of the sensitivity of aerodynamic conductance to solar radiation  $dg_a/dR_s$  during the time before noon. c) Box plot of the mean surface and air temperature difference ( $\overline{T_s - T_a}$ ) during the time before noon to evaporative fraction. The boxes indicate the 75<sup>th</sup> and 25<sup>th</sup> percentiles of the observations, respectively. The lines show the linear best fit for  $\overline{T_s - T_a}$  to evaporative fraction for each vegetation type with the equations in the plot.

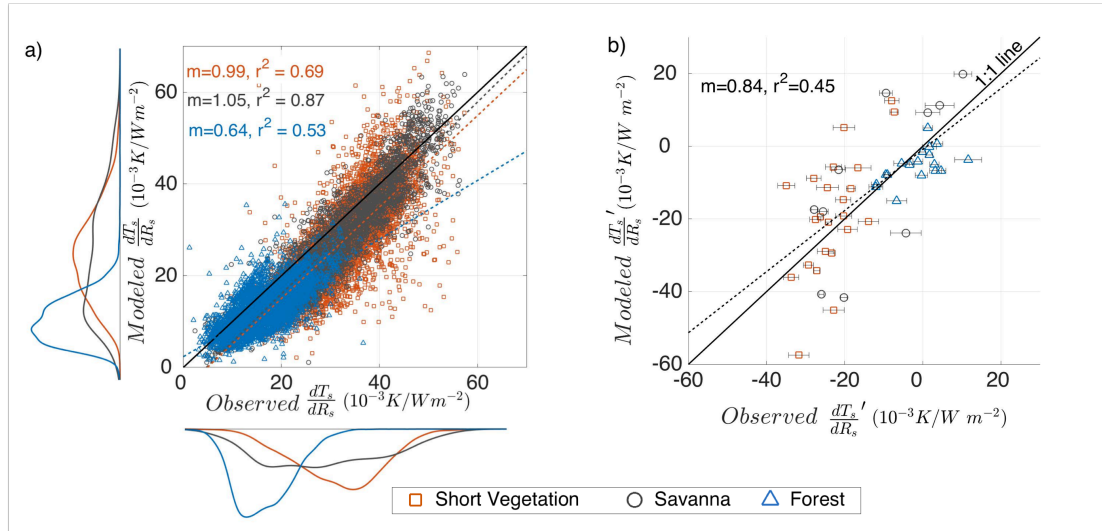

**New Figure 6** a) Modeled versus observed daily warming rates,  $\frac{dT_s}{dR_s}$ , for each site for the three vegetation types. The density distributions show the spread. The coefficient of determination ( $r^2$ ) is depicted for the linear fit (dashed lines). b) Model evaluation of the response of surface temperature warming rates to evaporative conditions ( $\frac{dT_s'}{dR_s}$ ) with those derived from observations for each site.

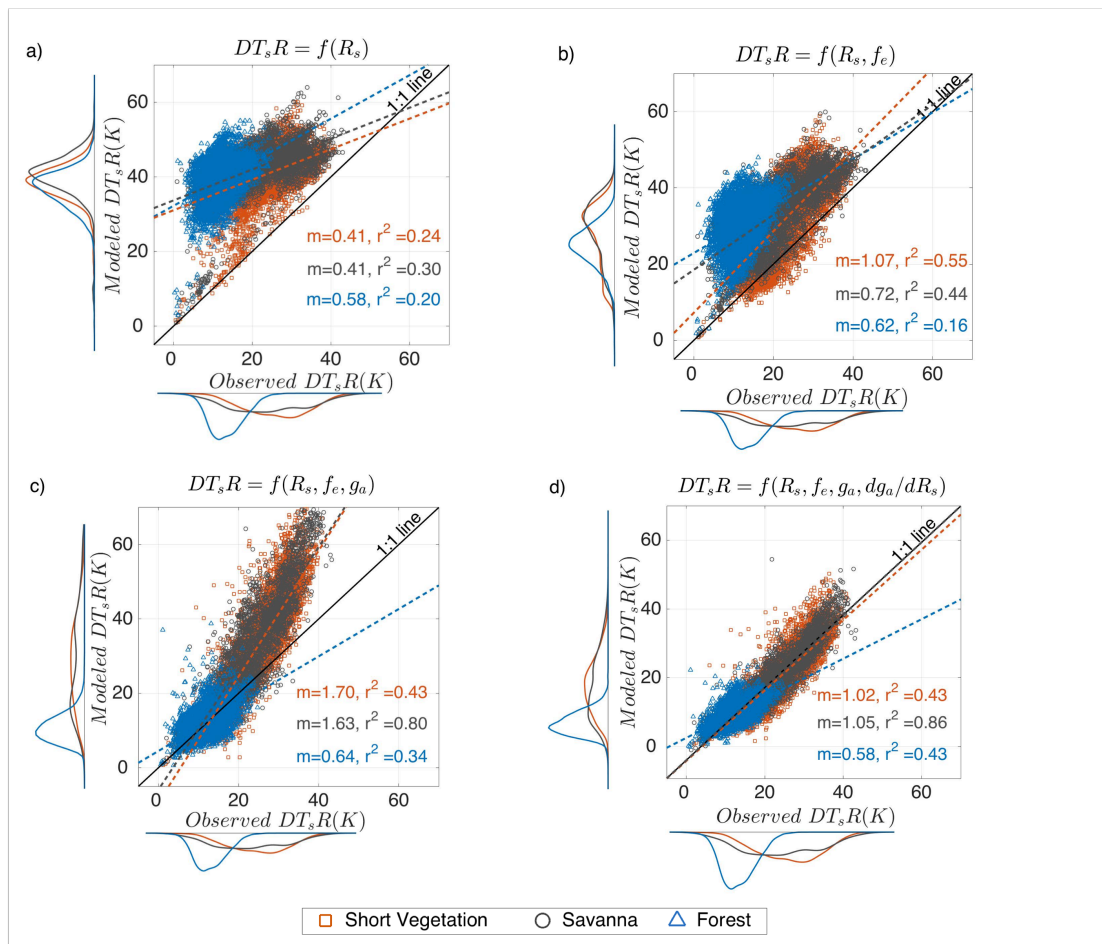

**New Figure 7 (old Figure 8)** Comparison of model estimates of the diurnal surface temperature range ( $DT_sR$ ) for short vegetation, savanna and forests with observations

for four scenarios: a)  $DT_sR$  is only a function of solar radiation ( $R_s$ ), b)  $DT_sR$  is a function of solar radiation ( $R_s$ ) and evaporative fraction ( $f_e$ ), c)  $DT_sR$  is a function of solar radiation and evaporative fraction, and mean aerodynamic conductance ( $g_a$ ), and d)  $DT_sR$  is a function of solar radiation, evaporative fraction, aerodynamic conductance and diurnal variation of aerodynamic conductance ( $dg_a/dR_s$ ). Dashed lines show the linear regression between model and observation.

- **Extra figures related to the response letter**

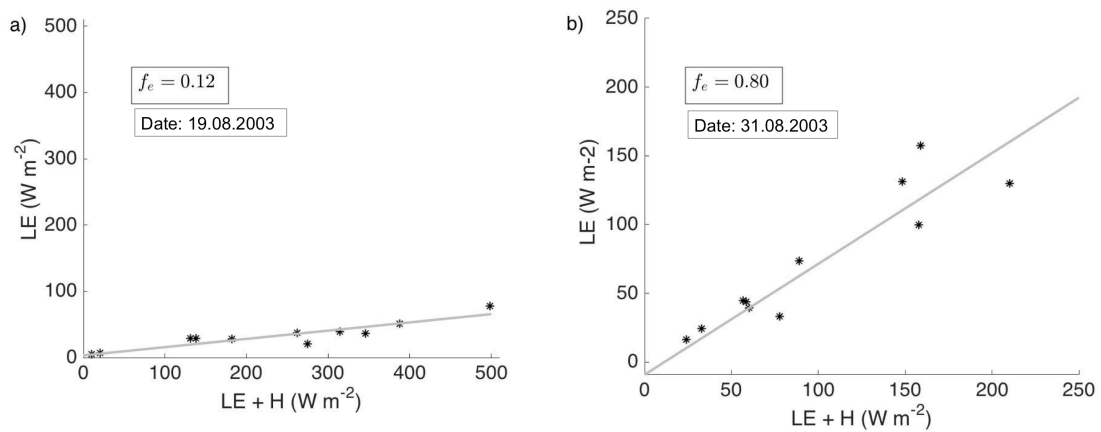

**Figure R1** Demonstrating the calculation of evaporative fraction ( $f_e$ ) for a dry (a), and a wet (b) day of a cropland site in Southern Great Plains (US-ARM, FLUXNET). We use the slope of the linear regression of half hourly morning time observations of latent heat flux (LE) and total turbulent heat flux (LE + H) to obtain daily evaporative fraction.

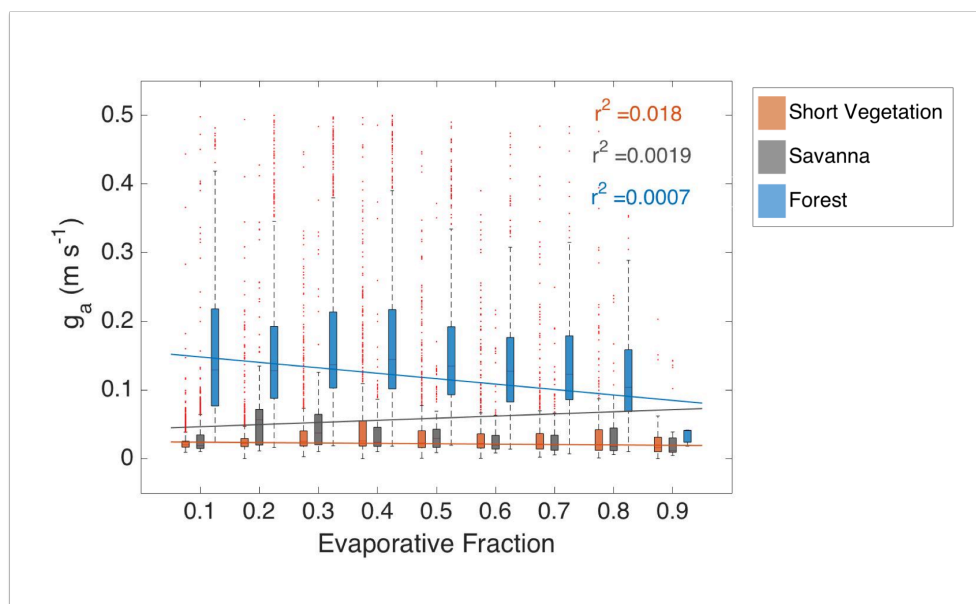

**Figure R2** Boxplot of the variation of mean aerodynamic conductance with evaporative fraction for the three vegetation types.

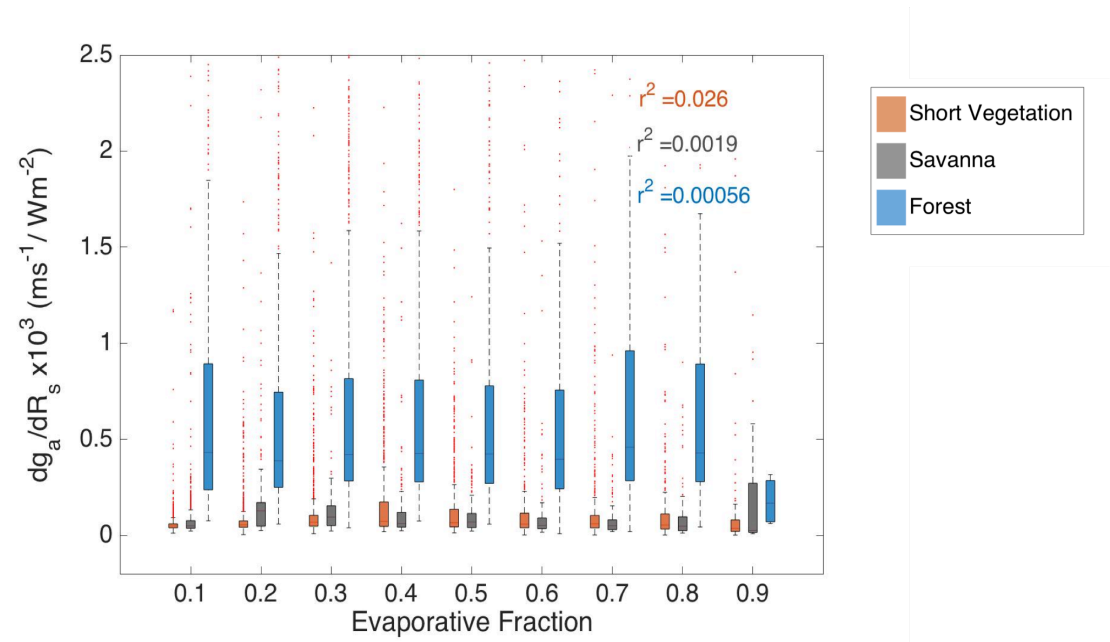

**Figure R3** Boxplot showing the relationship between  $dg_a/dR_s$  and evaporative fraction for the three vegetation types.
